# Supplementary material for: High-Resolution Mapping of Spontaneous Mitotic Recombination Hotspots on the 1.1 Mb Arm of Yeast Chromosome IV
Source: PLoS Genet. 2013 Apr 4;9(4):e1003434. doi: 10.1371/journal.pgen.1003434 (PMC3616911; doi:10.1371/journal.pgen.1003434)
Supplement: Table S1 — Depictions of conversion tracts associated with reciprocal crossovers. All of the different types of conversion tracts observed in this study are shown in this table. For each conversion tract, the top colored line depicts the red side of the sector and the bottom line depicts the white side of the sector. Green, red, and black indicate heterozygosity for SNPs, homozygosity for W303a-derived SNPs, and homozygosity for YJM789-derived SNPs, respectively. Lowercase letters located above and below the conversion tract mark transitions within the conversion tract. The coordinates of the SNPs on either side of the transitions are listed in Table S2. The blue boxes enclose the regions that are likely to be associated with DSB formation as described in Text S1. Our interpretations of subclasses as representing G1- or G2-initiated events are indicated by asterisks to the right of the subclass names. One asterisk and two asterisks indicate a G1- and G2-initiated DSB, respectively. The lengths of the conversion tracts are not drawn to scale. (XLSX) [file pgen.1003434.s008.xlsx]

## Sheet: Sheet1
Table S1. Depictions of conversion tracts associated with reciprocal crossovers
Class	Number of times class observed	Number of times subclass observed
A	18		Simple crossover, no conversion tract
				a
				a
B	29		3:1 conversion tract
B1**		16
				a		b
						b
B2**		13
						b
				a
C	7		4:0 conversion tract
C1*		1
				a
				a		b
C2*		6
				a		b
				a
D	45		Simple hybrid conversion tract (4:0/3:1 or 3:1/4:0/3:1)
D1*		4
				a
				a		b		c
D2*		3
				a		b		c
				a
D3*		3
				a
						b		c
D4*		6
						b		c
				a
D5*		8
				a
						b		c		d
D6*		13
						b		c		d
				a
D7*		2
						b
				a				c		d
D8*		6
				a				c		d
						b
E	39		Complex conversion tracts
E1**		1
				a		b		c
								c
E2**		1
										d
				a		b		c
E3*		4
				a		b
				a		b
E4*		1
				a		b
						b
E5*		1
								c
				a		b		c
E6*		1
				a		b		c
				a				c
E7*		1
				a		b		c
				a						d
E8*		3
						b
				a		b		c
E9*		1
				a		b		c
						b		c
E10*		1
				a		b		c
						b				d
E11*		1
								c
				a		b				d
E12*		2
				a		b				d
								c
E13*		1
				a		b				d
								c		d
E14*		1
				a
						b		c		d		e
E15*		1
						b		c				e
				a						d		e
E16*		1
										d
				a		b		c				e
E17*		1
								c
				a		b		c		d		e
E18*		1
				a				c				e
						b		c		d
E19*		1
				a				c		d		e		f
						b
E20*		1
				a		b		c
				a		b		c
E21*		1
				a				c		d
						b		c		d
E22*		1
				a		b		c		d		e
				a		b		c
E23*		1
						b						e		f
				a				c		d						g
E24*		1
										d
				a		b		c				e		f		g		h
E25*		1
				a
				a		b		c		d
E26*		1
						b		c		d
				a
E27*		1
				a		b		c		d		e
				a
E28*		1
				a
						b		c		d		e		f
E29*		1
						b		c		d		e		f
				a
E30*		1
						b		c		d
				a				c		d		e
E31*		1
						b				d		e
				a		b		c
E32*		1
				a		b				d		e		f
								c				e		f
E33*		1
				a				c		d		e		f
						b
E34*		1
				a						c		d
						b
